# Supplementary material for: Sex Differences in Cancer-Specific Survival Are Pronounced during Adolescence and Young Adulthood: A SEER Population-Based Study
Source: MDPI journal article supplement (doi:10.3390/epidemiologia2030029), 2021-09-01
Supplement: s1 [file s1]

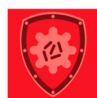

# Supplementary Materials: Sex Differences in Cancer-Specific Survival Are Pronounced During Adolescence and Young Adulthood: A SEER Population-Based Study

**Table S1.** Absolute and relative site-specific frequencies and site-specific absolute frequency ratios for boys and girls with sex-nonspecific cancers ( $n = 45,124$ ).

| Site                                                | Frequencies            |                         | Absolute Frequency Ratio (M:F) |
|-----------------------------------------------------|------------------------|-------------------------|--------------------------------|
|                                                     | Boys, $n = 24,458$ (%) | Girls, $n = 20,666$ (%) |                                |
| Non-Hodgkin lymphoma                                | 2,035 (8.3)            | 939 (4.5)               | 2.2                            |
| Hodgkin lymphoma                                    | 1,090 (4.5)            | 689 (3.3)               | 1.6                            |
| Chronic myeloid leukemia                            | 217 (0.9)              | 147 (0.7)               | 1.5                            |
| Liver and intrahepatic bile duct                    | 578 (2.4)              | 393 (1.9)               | 1.5                            |
| Other endocrine, including thymus                   | 1,150 (4.7)            | 817 (4.0)               | 1.4                            |
| Acute monocytic leukemia                            | 136 (0.6)              | 110 (0.5)               | 1.2                            |
| Acute lymphocytic leukemia                          | 6,944 (28.4)           | 5,726 (27.7)            | 1.2                            |
| Brain                                               | 4,177 (17.1)           | 3,522 (17.0)            | 1.2                            |
| Bones and joints                                    | 1,182 (4.8)            | 1,034 (5.0)             | 1.1                            |
| Acute myeloid leukemia                              | 1,116 (4.6)            | 981 (4.7)               | 1.1                            |
| Eye and orbit                                       | 648 (2.6)              | 574 (2.8)               | 1.1                            |
| Soft tissue, including heart                        | 1,621 (6.6)            | 1,585 (7.7)             | 1.0                            |
| Oral cavity and pharynx                             | 219 (0.9)              | 222 (1.1)               | 1.0                            |
| Retroperitoneum, peritoneum, omentum, and mesentery | 230 (0.9)              | 238 (1.2)               | 1.0                            |
| Nose, nasal cavity, and middle ear                  | 57 (0.2)               | 62 (0.3)                | 0.9                            |
| Kidney and renal pelvis                             | 1,230 (5.0)            | 1,365 (6.6)             | 0.9                            |
| Lung and bronchus                                   | 62 (0.3)               | 72 (0.3)                | 0.9                            |
| Melanoma of the skin                                | 271 (1.1)              | 331 (1.6)               | 0.8                            |

Abbreviations: F, female; M, male.

**Table S2.** Absolute and relative site-specific frequencies and site-specific frequency ratios for male and female adolescents and young adults with sex-nonspecific cancers ( $n = 548,158$ ).

| Site                               | Frequencies                  |                                | Absolute Frequency Ratio<br>(M:F) |
|------------------------------------|------------------------------|--------------------------------|-----------------------------------|
|                                    | Male AYAs, $n = 275,514$ (%) | Female AYAs, $n = 272,644$ (%) |                                   |
| Kaposi sarcoma                     | 4,215 (1.5)                  | 118 (0.0)                      | 35.7                              |
| Esophagus                          | 3,330 (1.2)                  | 692 (0.3)                      | 4.8                               |
| Larynx                             | 3,061 (1.1)                  | 1,003 (0.4)                    | 3.1                               |
| Urinary bladder                    | 9,566 (3.5)                  | 3,287 (1.2)                    | 2.9                               |
| Liver and intrahepatic bile duct   | 4,685 (1.7)                  | 1,787 (0.7)                    | 2.6                               |
| Oral cavity and pharynx            | 16,727 (6.1)                 | 7,679 (2.8)                    | 2.2                               |
| Chronic lymphocytic leukemia       | 2,133 (0.8)                  | 1,205 (0.4)                    | 1.8                               |
| Pleura                             | 23 (0.0)                     | 13 (0.0)                       | 1.8                               |
| Kidney and renal pelvis            | 18,975 (6.9)                 | 11,221 (4.1)                   | 1.7                               |
| Acute lymphocytic leukemia         | 4,053 (1.5)                  | 2,409 (0.9)                    | 1.7                               |
| Ureter                             | 73 (0.0)                     | 44 (0.0)                       | 1.7                               |
| Nose, nasal cavity, and middle ear | 1,147 (0.4)                  | 695 (0.3)                      | 1.7                               |
| Chronic myeloid leukemia           | 3,671 (1.3)                  | 2,389 (0.9)                    | 1.5                               |
| Non-Hodgkin lymphoma               | 27,015 (9.8)                 | 17,797 (6.5)                   | 1.5                               |
| Bones and joints                   | 3,333 (1.2)                  | 2,319 (0.9)                    | 1.4                               |
| Brain                              | 12,535 (4.5)                 | 8,778 (3.2)                    | 1.4                               |
| Eye and orbit                      | 755 (0.3)                    | 562 (0.2)                      | 1.3                               |
| Myeloma                            | 3,876 (1.4)                  | 2,964 (1.1)                    | 1.3                               |
| Stomach                            | 6,574 (2.4)                  | 5,082 (1.9)                    | 1.3                               |
| Other endocrine, including thymus  | 1,503 (0.5)                  | 1,162 (0.4)                    | 1.3                               |
| Soft tissue, including heart       | 7,350 (2.7)                  | 5,917 (2.2)                    | 1.2                               |
| Pancreas                           | 5,318 (1.9)                  | 4,406 (1.6)                    | 1.2                               |

|                                                     |               |               |     |
|-----------------------------------------------------|---------------|---------------|-----|
| Mesothelioma                                        | 357 (0.1)     | 302 (0.1)     | 1.2 |
| Small intestine                                     | 2,093 (0.8)   | 1,822 (0.7)   | 1.1 |
| Hodgkin lymphoma                                    | 13,027 (4.7)  | 11,401 (4.2)  | 1.1 |
| Colon and rectum                                    | 34,590 (12.6) | 30,835 (11.3) | 1.1 |
| Acute myeloid leukemia                              | 4,983 (1.8)   | 4,683 (1.7)   | 1.1 |
| Lung and bronchus                                   | 17,407 (6.3)  | 16,982 (6.2)  | 1.0 |
| Anus, anal canal, and anorectum                     | 2,155 (0.8)   | 2,118 (0.8)   | 1.0 |
| Acute monocytic leukemia                            | 340 (0.1)     | 339 (0.1)     | 1.0 |
| Melanoma of the skin                                | 31,900 (11.6) | 42,469 (15.6) | 0.8 |
| Retroperitoneum, peritoneum, omentum, and mesentery | 629 (0.2)     | 1,037 (0.4)   | 0.6 |
| Gallbladder                                         | 313 (0.1)     | 745 (0.3)     | 0.4 |
| Thyroid                                             | 16,321 (5.9)  | 69,754 (25.6) | 0.2 |

Abbreviations: F, female; M, male.

**Table S3.** Absolute and relative site-specific frequencies and site-specific frequency ratios for older adult men and women with sex-nonspecific cancers ( $n = 2,792,994$ ).

| Site                    | Frequencies                          |                                        | Absolute Frequency Ratio (M:F) |
|-------------------------|--------------------------------------|----------------------------------------|--------------------------------|
|                         | Older Adult Men, $n = 1,593,416$ (%) | Older Adult Women, $n = 1,199,578$ (%) |                                |
| Larynx                  | 30,734 (1.9)                         | 7,103 (0.6)                            | 4.3                            |
| Kaposi sarcoma          | 2,022 (0.1)                          | 525 (0.0)                              | 3.9                            |
| Esophagus               | 37,917 (2.4)                         | 10,698 (0.9)                           | 3.5                            |
| Mesothelioma            | 7,722 (0.5)                          | 2,407 (0.2)                            | 3.2                            |
| Urinary bladder         | 162,174 (10.2)                       | 52,798 (4.4)                           | 3.1                            |
| Oral cavity and pharynx | 80,670 (5.1)                         | 32,452 (2.7)                           | 2.5                            |
| Liver and intrahepatic  | 41,006 (2.6)                         | 16,845 (1.4)                           | 2.4                            |

|                                    |                |                |     |
|------------------------------------|----------------|----------------|-----|
| bile duct                          |                |                |     |
| Pleura                             | 163 (0.0)      | 92 (0.0)       | 1.8 |
| Kidney and renal pelvis            | 86,018 (5.4)   | 51,074 (4.3)   | 1.7 |
| Melanoma of the skin               | 115,242 (7.2)  | 72,494 (6.0)   | 1.6 |
| Stomach                            | 48,606 (3.1)   | 30,950 (2.6)   | 1.6 |
| Chronic lymphocytic leukemia       | 29,884 (1.9)   | 20,563 (1.7)   | 1.5 |
| Nose, nasal cavity, and middle ear | 3,875 (0.2)    | 2,696 (0.2)    | 1.4 |
| Ureter                             | 2,603 (0.2)    | 1,909 (0.2)    | 1.4 |
| Eye and orbit                      | 2,809 (0.2)    | 2,069 (0.2)    | 1.4 |
| Chronic myeloid leukemia           | 8,276 (0.5)    | 6,120 (0.5)    | 1.4 |
| Brain                              | 23,772 (1.5)   | 18,187 (1.5)   | 1.3 |
| Hodgkin lymphoma                   | 6,338 (0.4)    | 4,874 (0.4)    | 1.3 |
| Acute monocytic leukemia           | 1,083 (0.1)    | 841 (0.1)      | 1.3 |
| Soft tissue, including heart       | 13,642 (0.9)   | 10,847 (0.9)   | 1.3 |
| Acute myeloid leukemia             | 17,615 (1.1)   | 14,088 (1.2)   | 1.3 |
| Bones and joints                   | 2,202 (0.1)    | 1,801 (0.2)    | 1.2 |
| Myeloma                            | 35,887 (2.3)   | 29,777 (2.5)   | 1.2 |
| Lung and bronchus                  | 314,317 (19.7) | 273,759 (22.8) | 1.1 |
| Non-Hodgkin lymphoma               | 100,408 (6.3)  | 91,096 (7.6)   | 1.1 |
| Small intestine                    | 10,791 (0.7)   | 10,003 (0.8)   | 1.1 |
| Colon and rectum                   | 243,660 (15.3) | 230,567 (19.2) | 1.1 |

|                                                     |              |              |     |
|-----------------------------------------------------|--------------|--------------|-----|
| Acute lymphocytic leukemia                          | 2,155 (0.1)  | 2,059 (0.2)  | 1.0 |
| Pancreas                                            | 58,427 (3.7) | 55,858 (4.7) | 1.0 |
| Other endocrine, including thymus                   | 2,420 (0.2)  | 2,380 (0.2)  | 1.0 |
| Anus, anal canal, and anorectum                     | 6,193 (0.4)  | 11,399 (1.0) | 0.5 |
| Gallbladder                                         | 3,803 (0.2)  | 9,104 (0.8)  | 0.4 |
| Thyroid                                             | 21,324 (1.3) | 55,724 (4.6) | 0.4 |
| Retroperitoneum, peritoneum, omentum, and mesentery | 1,888 (0.1)  | 7,924 (0.7)  | 0.2 |

Abbreviations: F, female; M, male.
